# Supplementary material
Source: publisher site journal article supplement (https://neobiota.pensoft.net/article/21470/download/suppl/32/)
Supplement: Supplementary file 1

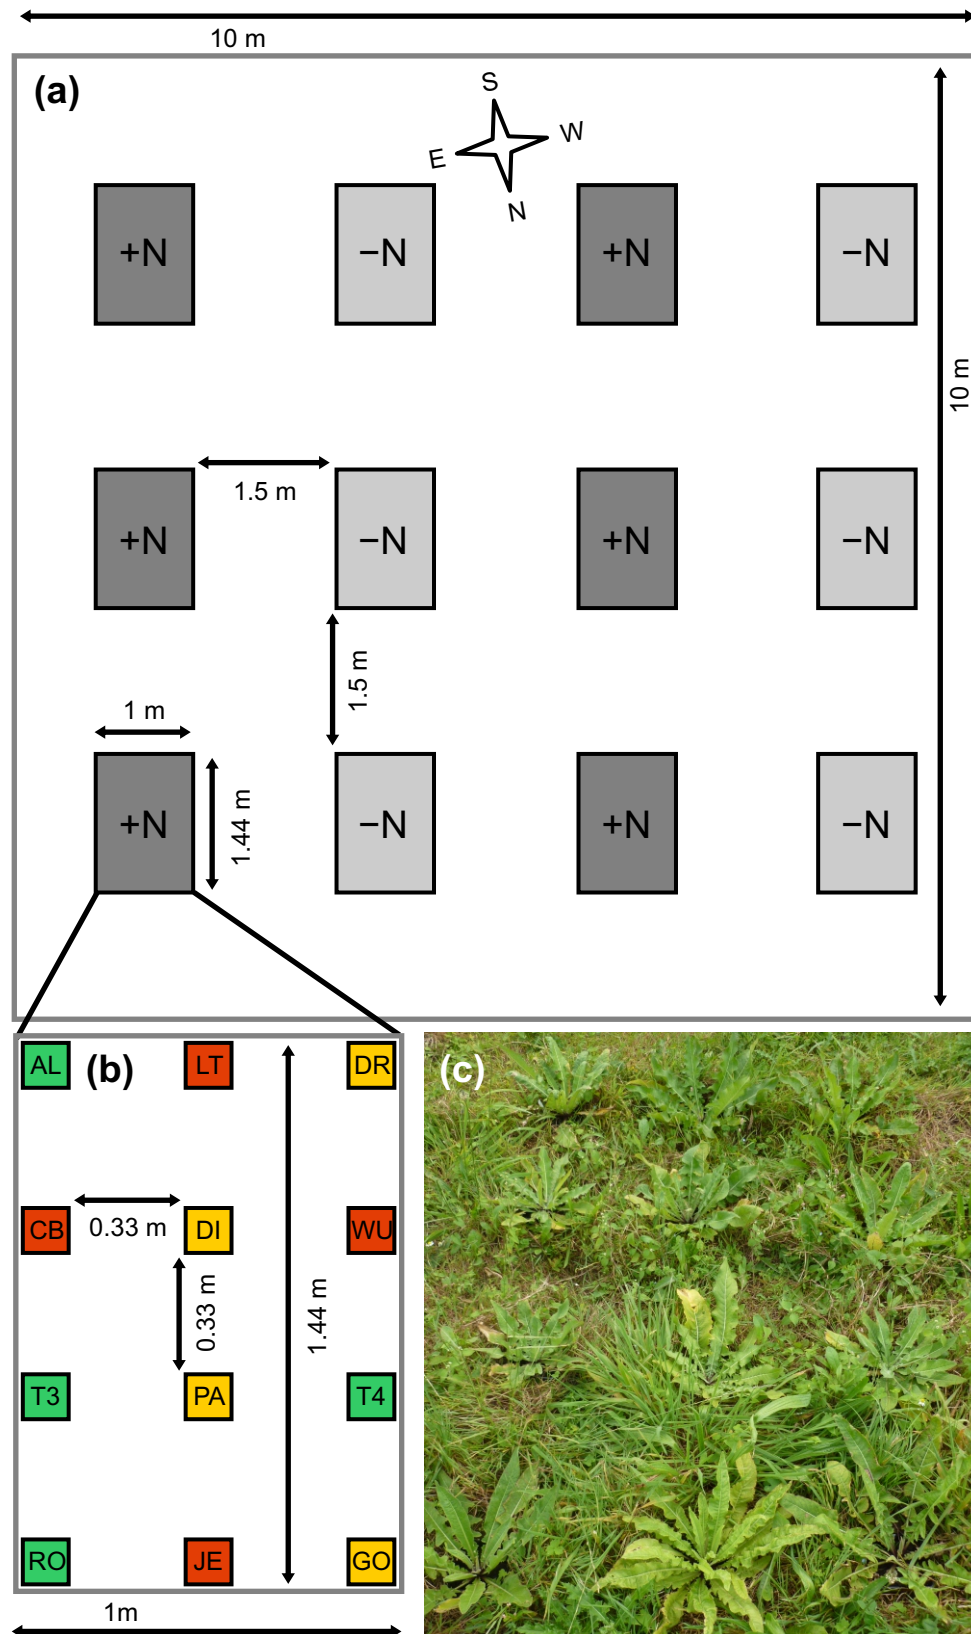

**Figure S1.** Design of the common garden field experiment. *Bunias orientalis* plants from 12 populations of native (green), invasive (red), and naturalised (yellow) status were used. (a) 12 Plots, consisting of one plant per population in a randomised order, were supplied with either high ('+N'; dark grey) or low nitrate ('-N'; light grey) in a mineral nutrient solution. The orientation is shown with a compass in the top centre. (b) Arrangement of one plot (for population codes see Table 1). Each population had each position within the plots once. (c) Photograph of one plot, approximately ten weeks after set-up of the experiment.
